# Supplementary material for: Unprecedented NaI–CuII–LnIII heterometallic coordination polymers based on 3,5-pyrazoledicarboxylate with both infinite cationic and anionic chains
Source: Royal Society of Chemistry journal article supplement (doi:10.1039/b808180h), 2008-01-01
Supplement: b808180h.pdf [file b808180h.pdf]

## Supporting Information for

### Unprecedented Na<sup>I</sup>-Cu<sup>II</sup>-Ln<sup>III</sup> heterometallic coordination polymers based on 3,5-pyrazoledicarboxylate with both infinite cationic and anionic chains

Yan Wang,<sup>a,b</sup> You Song,<sup>a</sup> Zhao-Rui Pan,<sup>a</sup> Ying-Zhong Shen,<sup>b</sup> Zheng Hu,<sup>a</sup> Zi-Jian Guo,<sup>a</sup> and He-Gen Zheng<sup>\*a</sup>

<sup>a</sup> State Key Laboratory of Coordination Chemistry and Key Laboratory for Mesoscopic Chemistry of Ministry of Education College of Chemistry and Chemical Engineering, Laboratory of Solid State Microstructures, Nanjing University, Nanjing 210093, P. R. China. E-mail: zhenghg@nju.edu.cn; Fax: 86-25-83314502; Tel: 86-25-83686155

<sup>b</sup> Applied Chemistry Department, School of Material Science & Engineering, Nanjing University of Aeronautics & Astronautics, Nanjing 210016, P. R. China

**\*Corresponding author: Prof. Zheng E-mail: zhenghg@nju.edu.cn; Fax: 86-25-83314502; Tel: 86-25-83686155**

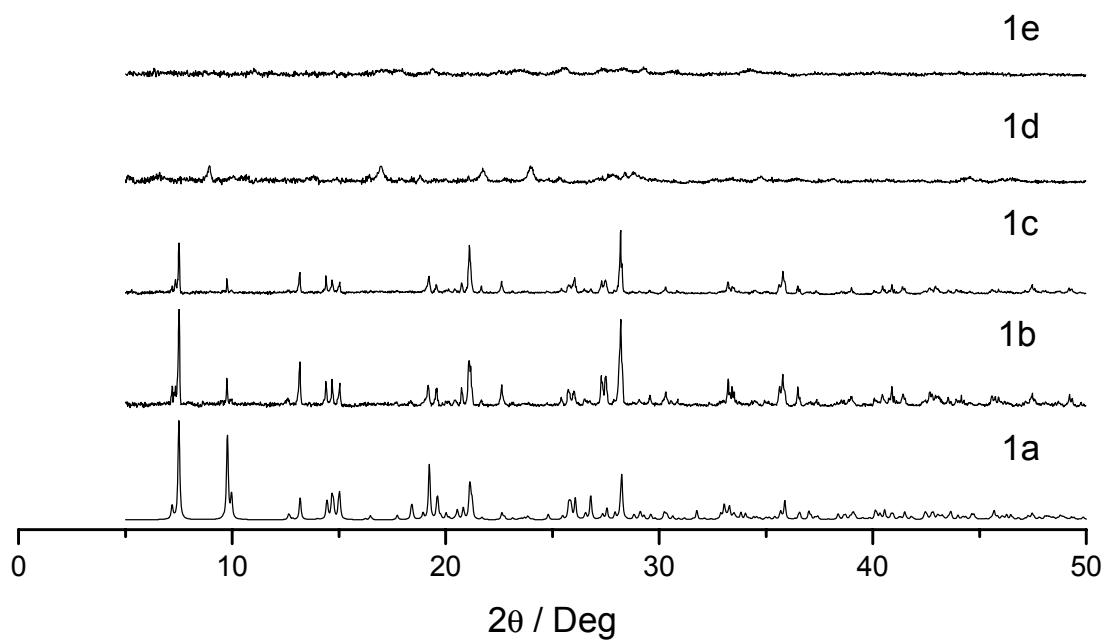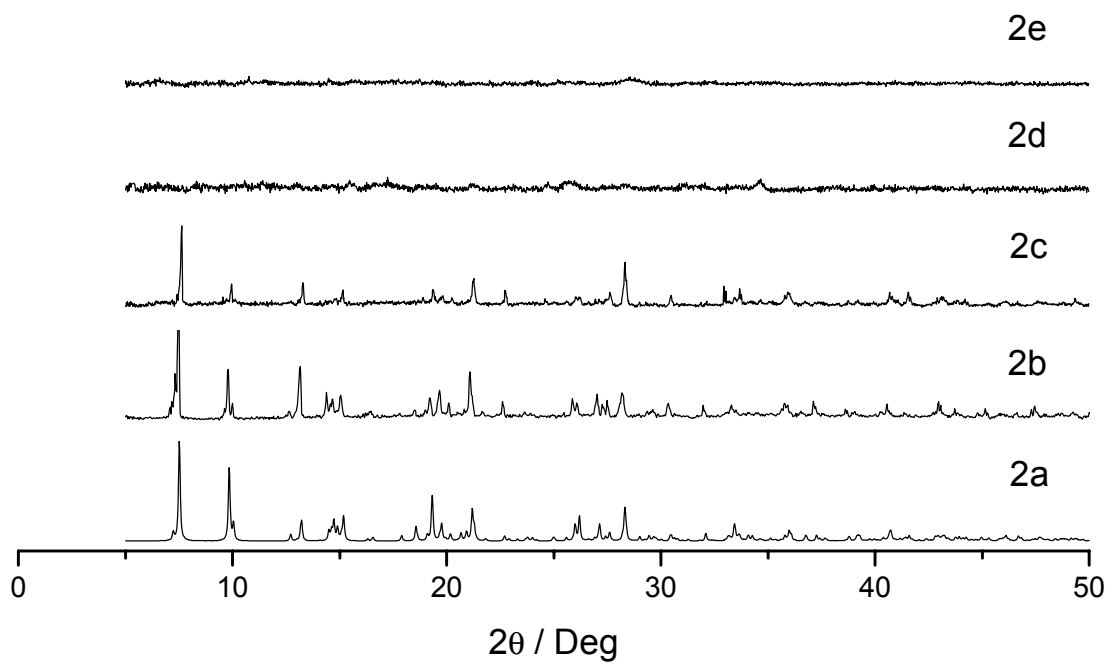

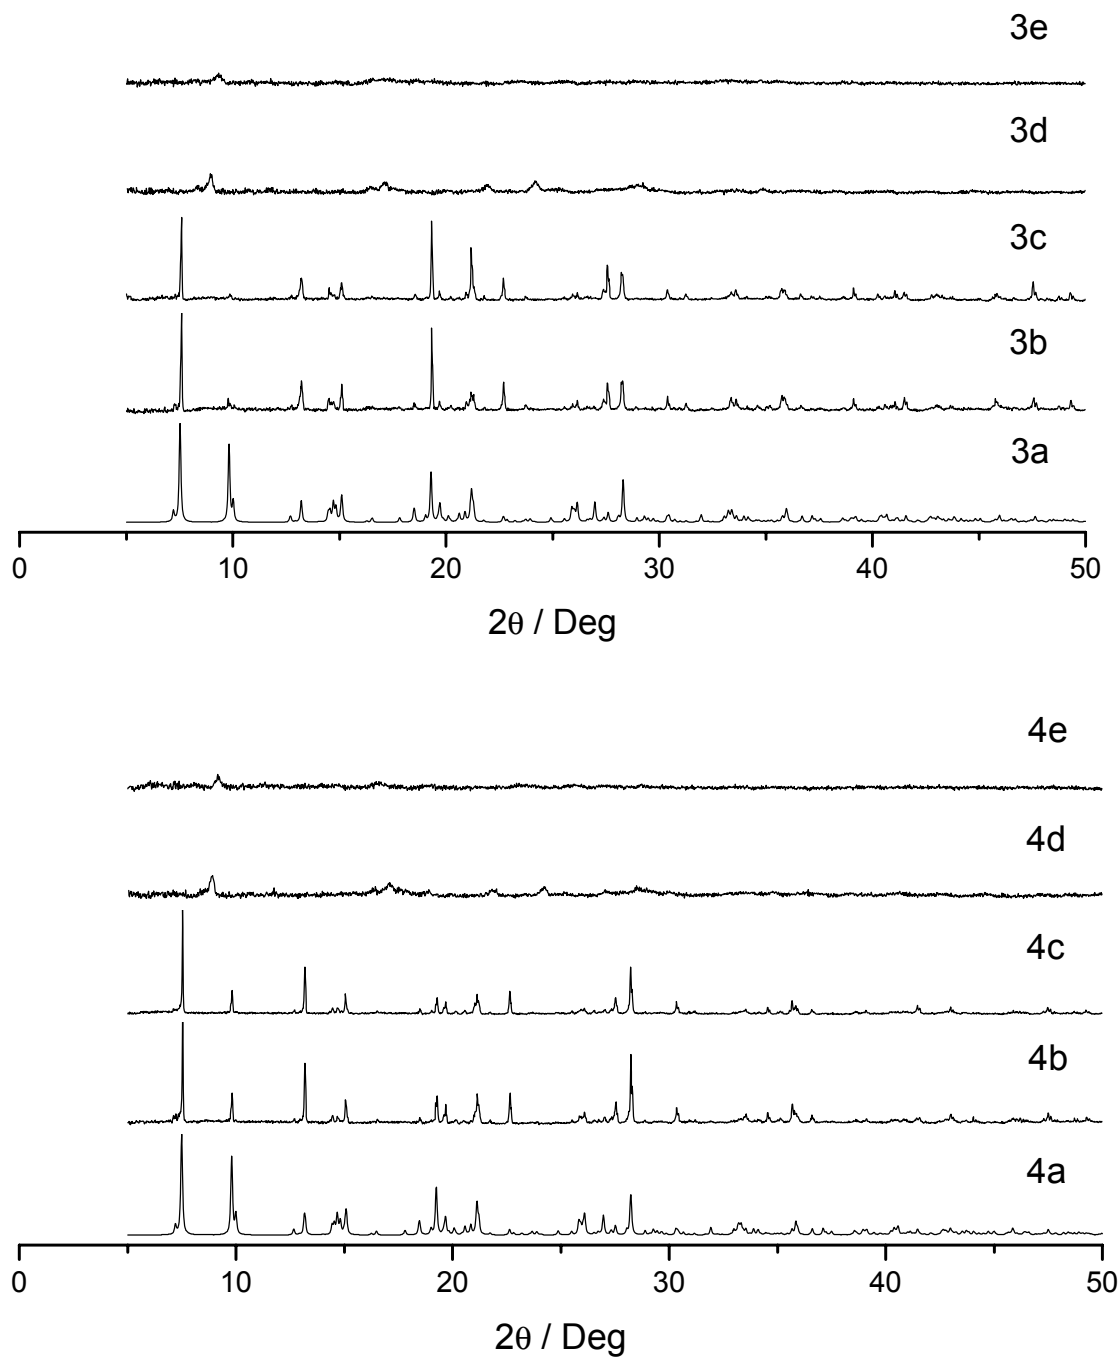

**Fig. S1** Simulated and experimental XRPD patterns of complexes 1–4: the simulated (a); the experimental at 25°C (b), 60°C (c), 150°C (d) and 220°C (e).

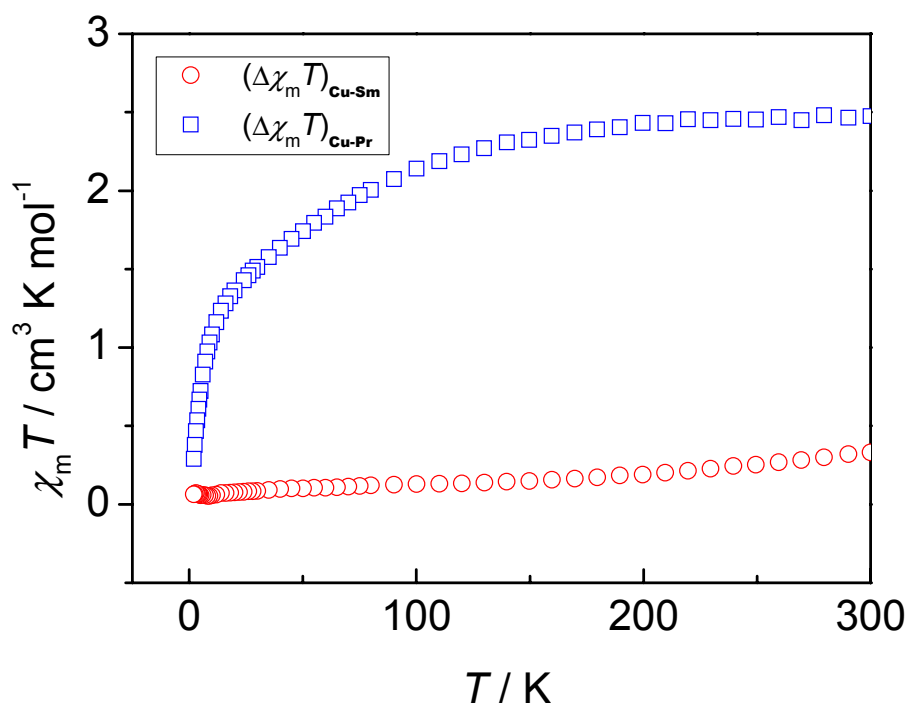

**Fig. S2** Thermal dependence of  $(\Delta\chi_m T)_{\text{Cu-Ln}}$ :  $(\Delta\chi_m T)_{\text{Cu-Sm}} = (\chi_m T)_{\text{Cu-Sm}} - (\chi_m T)_{\text{Cu-La}}$  and  $(\Delta\chi_m T)_{\text{Cu-Pr}} = (\chi_m T)_{\text{Cu-Pr}} - (\chi_m T)_{\text{Cu-La}}$

**Table S1. Selected bond lengths (Å) and bond angles (°) for 1–4**

| <b>Complex 1</b>                                                                         |          |                           |          |                           |          |
|------------------------------------------------------------------------------------------|----------|---------------------------|----------|---------------------------|----------|
| Na1—O14                                                                                  | 2.353(4) | Cu1—N3                    | 1.920(3) | La1—O10                   | 2.583(3) |
| Na1—O15                                                                                  | 2.403(4) | Cu1—O1                    | 2.001(3) | La1—O11                   | 2.584(3) |
| Na1—O15 <sup>i</sup>                                                                     | 2.412(4) | Cu1—O5                    | 1.975(3) | La1—O12                   | 2.487(3) |
| Na1—O14 <sup>ii</sup>                                                                    | 2.418(4) | Cu1—O9                    | 2.344(3) | La1—O13                   | 2.581(3) |
| Na1—O16                                                                                  | 2.454(4) | La1—O3                    | 2.612(3) | La1—N2                    | 2.649(3) |
| Na1—O17                                                                                  | 2.584(6) | La1—O4 <sup>iii</sup>     | 2.595(3) | La1—N4                    | 2.615(3) |
| Cu1—N1                                                                                   | 1.928(3) | La1—O7                    | 2.553(3) |                           |          |
| O14—Na1—O15                                                                              | 104.8(1) | O5—Cu1—O9                 | 94.3(1)  | O13—La1—O3                | 71.6(1)  |
| O15—Na1—O15 <sup>i</sup>                                                                 | 85.3(1)  | O1—Cu1—O9                 | 94.8(1)  | O10—La1—O3                | 97.0(1)  |
| O14—Na1—O14 <sup>ii</sup>                                                                | 86.3(1)  | O12—La1—O7                | 69.8(1)  | O11—La1—O3                | 69.6(1)  |
| O15 <sup>i</sup> —Na1—O14 <sup>ii</sup>                                                  | 83.6(1)  | O12—La1—O13               | 75.7(1)  | O4 <sup>iii</sup> —La1—O3 | 143.0(1) |
| O14—Na1—O16                                                                              | 89.7(1)  | O7—La1—O13                | 70.0(1)  | O12—La1—N4                | 130.5(1) |
| O15—Na1—O16                                                                              | 91.5(1)  | O12—La1—O10               | 138.9(1) | O7—La1—N4                 | 61.6(1)  |
| O15 <sup>i</sup> —Na1—O16                                                                | 89.6(1)  | O7—La1—O10                | 127.4(1) | O13—La1—N4                | 79.6(1)  |
| O14 <sup>ii</sup> —Na1—O16                                                               | 88.0(1)  | O13—La1—O10               | 142.4(1) | O10—La1—N4                | 82.4(1)  |
| O14—Na1—O17                                                                              | 82.8(2)  | O12—La1—O11               | 72.0(1)  | O11—La1—N4                | 147.2(1) |
| O15—Na1—O17                                                                              | 71.8(2)  | O7—La1—O11                | 126.0(1) | O4 <sup>iii</sup> —La1—N4 | 84.0(1)  |
| O15 <sup>i</sup> —Na1—O17                                                                | 101.1(2) | O13—La1—O11               | 133.0(1) | O3—La1—N4                 | 131.1(1) |
| O14 <sup>ii</sup> —Na1—O17                                                               | 110.9(2) | O10—La1—O11               | 68.5(1)  | O12—La1—N2                | 137.0(1) |
| O16—Na1—O17                                                                              | 159.1(2) | O12—La1—O4 <sup>iii</sup> | 85.2(1)  | O7—La1—N2                 | 127.0(1) |
| N1—Cu1—O1                                                                                | 82.2(1)  | O7—La1—O4 <sup>iii</sup>  | 66.5(1)  | O13—La1—N2                | 75.6(1)  |
| N3—Cu1—O5                                                                                | 82.4(1)  | O13—La1—O4 <sup>iii</sup> | 136.2(1) | O10—La1—N2                | 67.8(1)  |
| N3—Cu1—N1                                                                                | 98.3(1)  | O10—La1—O4 <sup>iii</sup> | 73.3(1)  | O11—La1—N2                | 107.0(1) |
| O5—Cu1—O1                                                                                | 96.0(1)  | O11—La1—O4 <sup>iii</sup> | 73.7(1)  | O4 <sup>iii</sup> —La1—N2 | 137.0(1) |
| N3—Cu1—O9                                                                                | 91.6(1)  | O12—La1—O3                | 79.4(1)  | O3—La1—N2                 | 61.5(1)  |
| N1—Cu1—O9                                                                                | 94.5(1)  | O7—La1—O3                 | 135.3(1) | N4—La1—N2                 | 73.6(1)  |
| Symmetry codes: (i) $-x+1, y, -z+3/2$ ; (ii) $-x+1, -y, -z+1$ ; (iii) $x, -y+1, z+1/2$ . |          |                           |          |                           |          |
| <b>Complex 2</b>                                                                         |          |                           |          |                           |          |
| Na1—O14                                                                                  | 2.410(4) | Cu1—N3                    | 1.916(3) | Sm1—O10                   | 2.477(3) |
| Na1—O14 <sup>i</sup>                                                                     | 2.377(4) | Cu1—O1                    | 1.993(2) | Sm1—O11                   | 2.496(3) |
| Na1—O15                                                                                  | 2.336(4) | Cu1—O5                    | 1.972(3) | Sm1—O12                   | 2.395(3) |
| Na1—O15 <sup>ii</sup>                                                                    | 2.391(3) | Cu1—O9                    | 2.327(3) | Sm1—O13                   | 2.476(3) |
| Na1—O16                                                                                  | 2.451(4) | Sm1—O3                    | 2.550(3) | Sm1—N2                    | 2.571(3) |
| Na1—O17                                                                                  | 2.626(6) | Sm1—O4 <sup>iii</sup>     | 2.569(3) | Sm1—N4                    | 2.530(3) |
| Cu1—N1                                                                                   | 1.918(3) | Sm1—O7                    | 2.487(3) |                           |          |
| O15—Na1—O14 <sup>i</sup>                                                                 | 102.4(1) | N1—Cu1—O9                 | 93.9(1)  | O10—Sm1—O3                | 96.4(1)  |
| O15—Na1—O15 <sup>ii</sup>                                                                | 87.4(1)  | O5—Cu1—O9                 | 95.9(1)  | O7—Sm1—O3                 | 134.4(1) |
| O14 <sup>i</sup> —Na1—O15 <sup>ii</sup>                                                  | 170.2(1) | O1—Cu1—O9                 | 94.6(1)  | O11—Sm1—O3                | 69.3(1)  |
| O15—Na1—O14                                                                              | 171.6(1) | O12—Sm1—O13               | 76.2(1)  | N4—Sm1—O3                 | 134.0(1) |
| O14 <sup>i</sup> —Na1—O14                                                                | 86.1(1)  | O12—Sm1—O10               | 138.4(1) | O12—Sm1—O4 <sup>iii</sup> | 84.5(1)  |
| O15 <sup>ii</sup> —Na1—O14                                                               | 84.2(1)  | O13—Sm1—O10               | 142.0(1) | O13—Sm1—O4 <sup>iii</sup> | 135.9(1) |
| O15—Na1—O16                                                                              | 90.6(1)  | O12—Sm1—O7                | 68.6(1)  | O10—Sm1—O4 <sup>iii</sup> | 74.5(1)  |

|                            |          |             |          |                           |          |
|----------------------------|----------|-------------|----------|---------------------------|----------|
| O14 <sup>i</sup> —Na1—O16  | 91.7(1)  | O13—Sm1—O7  | 70.1(1)  | O7—Sm1—O4 <sup>iii</sup>  | 66.0(1)  |
| O15 <sup>ii</sup> —Na1—O16 | 86.8(1)  | O10—Sm1—O7  | 129.2(1) | O11—Sm1—O4 <sup>iii</sup> | 71.8(1)  |
| O14—Na1—O16                | 89.0(1)  | O12—Sm1—O11 | 71.2(1)  | N4—Sm1—O4 <sup>iii</sup>  | 83.6(1)  |
| O15—Na1—O17                | 81.2(2)  | O13—Sm1—O11 | 134.2(1) | O3—Sm1—O4 <sup>iii</sup>  | 140.6(1) |
| O14 <sup>i</sup> —Na1—O17  | 71.2(2)  | O10—Sm1—O11 | 68.2(1)  | O12—Sm1—N2                | 136.2(1) |
| O15 <sup>ii</sup> —Na1—O17 | 112.1(2) | O7—Sm1—O11  | 123.2(1) | O13—Sm1—N2                | 75.5(1)  |
| O14—Na1—O17                | 101.9(2) | O12—Sm1—N4  | 131.5(1) | O10—Sm1—N2                | 67.4(1)  |
| O16—Na1—O17                | 158.8(2) | O13—Sm1—N4  | 80.6(1)  | O7—Sm1—N2                 | 129.1(1) |
| N3—Cu1—N1                  | 97.2(1)  | O10—Sm1—N4  | 82.0(1)  | O11—Sm1—N2                | 107.7(1) |
| N3—Cu1—O5                  | 82.7(1)  | O7—Sm1—N4   | 63.5(1)  | N4—Sm1—N2                 | 74.9(1)  |
| N1—Cu1—O1                  | 82.7(1)  | O11—Sm1—N4  | 145.2(1) | O3—Sm1—N2                 | 62.7(1)  |
| O5—Cu1—O1                  | 96.3(1)  | O12—Sm1—O3  | 77.5(1)  | O4 <sup>iii</sup> —Sm1—N2 | 138.2(1) |
| N3—Cu1—O9                  | 92.1(1)  | O13—Sm1—O3  | 72.9(1)  |                           |          |

Symmetry codes: (i)  $-x+1, y, -z+3/2$ ; (ii)  $-x+1, -y+1, -z+2$ ; (iii)  $x, -y+1, z-1/2$ .

### Complex 3

|                                         |          |                       |          |                           |          |
|-----------------------------------------|----------|-----------------------|----------|---------------------------|----------|
| Na1—O14                                 | 2.333(5) | Cu1—N3                | 1.922(4) | Pr1—O10                   | 2.537(3) |
| Na1—O14 <sup>ii</sup>                   | 2.409(4) | Cu1—O1                | 1.994(3) | Pr1—O11                   | 2.540(4) |
| Na1—O15                                 | 2.400(5) | Cu1—O5                | 1.969(4) | Pr1—O12                   | 2.433(3) |
| Na1—O15 <sup>i</sup>                    | 2.395(4) | Cu1—O9                | 2.337(3) | Pr1—O13                   | 2.521(3) |
| Na1—O16                                 | 2.453(4) | Pr1—O3                | 2.575(4) | Pr1—N2                    | 2.606(4) |
| Na1—O17                                 | 2.623(8) | Pr1—O4 <sup>iii</sup> | 2.578(3) | Pr1—N4                    | 2.567(4) |
| Cu1—N1                                  | 1.925(4) | Pr1—O7                | 2.511(3) |                           |          |
| O14—Na1—O15 <sup>i</sup>                | 103.5(2) | N1—Cu1—O9             | 94.3(2)  | O13—Pr1—O3                | 72.0(1)  |
| O14—Na1—O15                             | 170.7(2) | O5—Cu1—O9             | 95.0(1)  | O10—Pr1—O3                | 96.2(1)  |
| O15 <sup>i</sup> —Na1—O15               | 85.8(2)  | O1—Cu1—O9             | 94.6(1)  | O11—Pr1—O3                | 69.5(1)  |
| O14—Na1—O14 <sup>ii</sup>               | 86.7(1)  | O12—Pr1—O7            | 69.4(1)  | N4—Pr1—O3                 | 132.4(1) |
| O15 <sup>i</sup> —Na1—O14 <sup>ii</sup> | 169.8(2) | O12—Pr1—O13           | 75.7(1)  | O12—Pr1—O4 <sup>iii</sup> | 85.0(1)  |
| O15—Na1—O14 <sup>ii</sup>               | 84.0(2)  | O7—Pr1—O13            | 70.1(1)  | O7—Pr1—O4 <sup>iii</sup>  | 66.4(1)  |
| O14—Na1—O16                             | 90.5(2)  | O12—Pr1—O10           | 138.7(1) | O13—Pr1—O4 <sup>iii</sup> | 136.3(1) |
| O15 <sup>i</sup> —Na1—O16               | 91.8(2)  | O7—Pr1—O10            | 128.8(1) | O10—Pr1—O4 <sup>iii</sup> | 74.3(1)  |
| O15—Na1—O16                             | 89.1(2)  | O13—Pr1—O10           | 141.9(1) | O11—Pr1—O4 <sup>iii</sup> | 72.8(1)  |
| O14 <sup>ii</sup> —Na1—O16              | 87.1(1)  | O12—Pr1—O11           | 72.0(1)  | N4—Pr1—O4 <sup>iii</sup>  | 83.9(1)  |
| O14—Na1—O17                             | 81.6(2)  | O7—Pr1—O11            | 125.0(1) | O3—Pr1—O4 <sup>iii</sup>  | 141.8(1) |
| O15 <sup>i</sup> —Na1—O17               | 70.8(2)  | O13—Pr1—O11           | 133.5(1) | O12—Pr1—N2                | 136.3(1) |
| O15—Na1—O17                             | 102.0(2) | O10—Pr1—O11           | 67.9(1)  | O7—Pr1—N2                 | 127.9(1) |
| O14 <sup>ii</sup> —Na1—O17              | 112.1(2) | O12—Pr1—N4            | 131.0(1) | O13—Pr1—N2                | 75.4(1)  |
| O16—Na1—O17                             | 158.5(2) | O7—Pr1—N4             | 62.5(1)  | O10—Pr1—N2                | 67.4(1)  |
| N3—Cu1—N1                               | 97.8(2)  | O13—Pr1—N4            | 80.0(1)  | O11—Pr1—N2                | 107.1(1) |
| N3—Cu1—O5                               | 82.5(2)  | O10—Pr1—N4            | 82.5(1)  | N4—Pr1—N2                 | 74.2(1)  |
| N1—Cu1—O1                               | 82.4(2)  | O11—Pr1—N4            | 146.2(1) | O3—Pr1—N2                 | 61.9(1)  |
| O5—Cu1—O1                               | 96.3(1)  | O12—Pr1—O3            | 78.3(1)  | O4 <sup>iii</sup> —Pr1—N2 | 137.7(1) |
| N3—Cu1—O9                               | 91.8(1)  | O7—Pr1—O3             | 134.9(1) |                           |          |

Symmetry codes: (i)  $-x+1, y, -z+1/2$ ; (ii)  $-x+1, -y+1, -z$ ; (iii)  $x, -y, z+1/2$ .

### Complex 4

|                       |          |                       |          |         |          |
|-----------------------|----------|-----------------------|----------|---------|----------|
| Na1—O14               | 2.416(3) | Cu1—N4                | 1.924(3) | Nd1—O10 | 2.526(3) |
| Na1—O14 <sup>i</sup>  | 2.346(4) | Cu1—O1                | 1.979(3) | Nd1—O11 | 2.527(3) |
| Na1—O15 <sup>ii</sup> | 2.400(4) | Cu1—O5                | 1.997(3) | Nd1—O12 | 2.430(3) |
| Na1—O15               | 2.413(4) | Cu1—O9                | 2.339(3) | Nd1—O13 | 2.509(3) |
| Na1—O16               | 2.460(4) | Nd1—O3                | 2.514(3) | Nd1—N1  | 2.567(3) |
| Na1—O17               | 2.620(6) | Nd1—O7                | 2.570(3) | Nd1—N3  | 2.602(3) |
| Cu1—N2                | 1.918(3) | Nd1—O8 <sup>iii</sup> | 2.581(3) |         |          |

|                                         |          |             |          |                           |          |
|-----------------------------------------|----------|-------------|----------|---------------------------|----------|
| O14 <sup>i</sup> —Na1—O15 <sup>ii</sup> | 103.0(1) | N4—Cu1—O9   | 94.0(1)  | O3—Nd1—O7                 | 134.6(1) |
| O14 <sup>i</sup> —Na1—O15               | 171.2(1) | O5—Cu1—O9   | 94.8(1)  | O10—Nd1—O7                | 96.4(1)  |
| O15 <sup>ii</sup> —Na1—O15              | 86.0(1)  | O1—Cu1—O9   | 95.3(1)  | O11—Nd1—O7                | 69.7(1)  |
| O14 <sup>i</sup> —Na1—O14               | 87.3(1)  | O12—Nd1—O13 | 75.9(1)  | N1—Nd1—O7                 | 132.8(1) |
| O15 <sup>ii</sup> —Na1—O14              | 169.7(2) | O12—Nd1—O3  | 69.2(1)  | O12—Nd1—O8 <sup>iii</sup> | 84.9(1)  |
| O15—Na1—O14                             | 83.8(1)  | O13—Nd1—O3  | 70.1(1)  | O13—Nd1—O8 <sup>iii</sup> | 136.1(1) |
| O14 <sup>i</sup> —Na1—O16               | 90.6(1)  | O12—Nd1—O10 | 138.6(1) | O3—Nd1—O8 <sup>iii</sup>  | 66.2(1)  |
| O15 <sup>ii</sup> —Na1—O16              | 91.7(1)  | O13—Nd1—O10 | 141.9(1) | O10—Nd1—O8 <sup>iii</sup> | 74.6(1)  |
| O15—Na1—O16                             | 89.0(1)  | O3—Nd1—O10  | 129.1(1) | O11—Nd1—O8 <sup>iii</sup> | 72.1(1)  |
| O14—Na1—O16                             | 87.0(1)  | O12—Nd1—O11 | 71.9(1)  | N1—Nd1—O8 <sup>iii</sup>  | 84.0(1)  |
| O14 <sup>i</sup> —Na1—O17               | 81.9(2)  | O13—Nd1—O11 | 134.1(1) | O7—Nd1—O8 <sup>iii</sup>  | 141.3(1) |
| O15 <sup>ii</sup> —Na1—O17              | 71.4(2)  | O3—Nd1—O11  | 124.3(1) | O12—Nd1—N3                | 136.1(1) |
| O15—Na1—O17                             | 101.5(2) | O10—Nd1—O11 | 67.8(1)  | O13—Nd1—N3                | 75.3(1)  |
| O14—Na1—O17                             | 111.7(2) | O12—Nd1—N1  | 131.4(1) | O3—Nd1—N3                 | 128.2(1) |
| O16—Na1—O17                             | 159.2(2) | O13—Nd1—N1  | 80.3(1)  | O10—Nd1—N3                | 67.4(1)  |
| N2—Cu1—N4                               | 97.5(1)  | O3—Nd1—N1   | 63.0(1)  | O11—Nd1—N3                | 107.5(1) |
| N2—Cu1—O1                               | 82.5(1)  | O10—Nd1—N1  | 82.3(1)  | N1—Nd1—N3                 | 74.2(1)  |
| N4—Cu1—O5                               | 82.7(1)  | O11—Nd1—N1  | 145.5(1) | O7—Nd1—N3                 | 62.3(1)  |
| O1—Cu1—O5                               | 96.4(1)  | O12—Nd1—O7  | 77.8(1)  | O8 <sup>iii</sup> —Nd1—N3 | 138.0(1) |
| N2—Cu1—O9                               | 91.9(1)  | O13—Nd1—O7  | 72.3(1)  |                           |          |

---

Symmetry codes: (i)  $-x+1, -y+1, -z+1$ ; (ii)  $-x+1, y, -z+3/2$ ; (iii)  $x, -y+1, z-1/2$ .

---

**Table S2. Hydrogen bonding geometry (Å, °)**

| <b>Complex 1</b>             |            |            |            |              |
|------------------------------|------------|------------|------------|--------------|
| <i>Donor—H…Acceptor</i>      | <i>D—H</i> | <i>H…A</i> | <i>D…A</i> | <i>D—H…A</i> |
| O9—H9A…O18 <sup>iv</sup>     | 0.94       | 2.05       | 2.695(4)   | 124          |
| O9—H9B…O2 <sup>iii</sup>     | 0.93       | 2.32       | 2.911(4)   | 121          |
| O10—H10A…O6 <sup>v</sup>     | 0.93       | 2.12       | 2.875(4)   | 138          |
| O10—H10B…O9                  | 0.93       | 2.26       | 2.865(4)   | 122          |
| O11—H11A…O19                 | 0.96       | 2.28       | 3.008(3)   | 132          |
| O11—H11B…O6 <sup>v</sup>     | 0.96       | 2.53       | 3.475(4)   | 168          |
| O12—H12B…O3 <sup>vi</sup>    | 0.94       | 1.82       | 2.690(4)   | 153          |
| O12—H12A…O8 <sup>i</sup>     | 0.92       | 2.58       | 3.320(4)   | 138          |
| O13—H13A…O7                  | 0.96       | 2.32       | 2.946(4)   | 122          |
| O13—H13B…O1 <sup>vii</sup>   | 0.96       | 1.80       | 2.744(4)   | 168          |
| O14—H14A…O18 <sup>viii</sup> | 0.96       | 1.85       | 2.772(5)   | 161          |
| O14—H14B…O1 <sup>ix</sup>    | 0.96       | 1.99       | 2.924(4)   | 165          |
| O15—H15A…O5 <sup>ix</sup>    | 0.96       | 2.48       | 3.303(4)   | 144          |
| O15—H15B…O2 <sup>x</sup>     | 0.96       | 1.84       | 2.773(4)   | 163          |
| O16—H16A…O7 <sup>xi</sup>    | 0.95       | 2.57       | 3.278(4)   | 132          |
| O16—H16B…O8 <sup>xi</sup>    | 0.95       | 2.30       | 2.908(4)   | 121          |
| O17—H17B…O13 <sup>vi</sup>   | 0.96       | 2.02       | 2.773(6)   | 134          |
| O17—H17A…O19                 | 0.94       | 2.32       | 2.833(7)   | 114          |
| O18—H18A…O8 <sup>xii</sup>   | 0.96       | 1.68       | 2.632(4)   | 173          |
| O18—H18B…O6                  | 0.96       | 1.77       | 2.704(4)   | 165          |
| O19—H19A…O4 <sup>iii</sup>   | 0.96       | 1.95       | 2.909(4)   | 173          |
| O19—H19B…O4 <sup>vi</sup>    | 0.97       | 1.96       | 2.909(4)   | 166          |

Symmetry codes: (i)  $-x+1, y, -z+3/2$ ; (iii)  $x, -y+1, z+1/2$ ; (iv)  $x, -y+1, z-1/2$ ; (v)  $-x+1/2, y-1/2, -z+3/2$ ; (vi)  $-x+1, -y+1, -z+1$ ; (vii)  $-x+1/2, -y+3/2, -z+1$ ; (viii)  $x+1/2, -y+1/2, z-1/2$ ; (ix)  $x+1/2, y-1/2, z$ ; (x)  $x+1/2, -y+1/2, z+1/2$ ; (xi)  $-x+1, y-1, -z+3/2$ ; (xii)  $-x+1/2, -y+3/2, -z+2$ .

| <b>Complex 2</b>             |            |            |            |              |
|------------------------------|------------|------------|------------|--------------|
| <i>Donor—H…Acceptor</i>      | <i>D—H</i> | <i>H…A</i> | <i>D…A</i> | <i>D—H…A</i> |
| O9—H9A…O2 <sup>iii</sup>     | 0.96       | 1.94       | 2.884(4)   | 169          |
| O9—H9B…O18                   | 0.96       | 1.74       | 2.681(4)   | 165          |
| O10—H10A…O9                  | 0.96       | 1.94       | 2.878(4)   | 165          |
| O10—H10B…O6 <sup>v</sup>     | 0.96       | 1.88       | 2.838(4)   | 176          |
| O11—H11A…O8 <sup>iv</sup>    | 0.97       | 1.93       | 2.848(4)   | 158          |
| O11—H11B…O6 <sup>v</sup>     | 0.96       | 2.47       | 3.422(4)   | 172          |
| O12—H12B…O8 <sup>vi</sup>    | 0.97       | 2.50       | 3.269(4)   | 136          |
| O12—H12A…O3 <sup>vii</sup>   | 0.99       | 1.78       | 2.694(4)   | 151          |
| O13—H13A…O17 <sup>viii</sup> | 0.95       | 1.98       | 2.765(6)   | 139          |
| O13—H13B…O1 <sup>ix</sup>    | 0.95       | 1.99       | 2.745(4)   | 135          |
| O14—H14A…O2 <sup>i</sup>     | 0.96       | 1.88       | 2.775(4)   | 155          |
| O14—H14B…O6 <sup>x</sup>     | 0.96       | 2.56       | 3.499(4)   | 166          |
| O15—H15A…O1 <sup>iv</sup>    | 0.96       | 2.03       | 2.915(4)   | 152          |
| O15—H15B…O18 <sup>iv</sup>   | 0.97       | 1.79       | 2.745(4)   | 165          |
| O16—H16A…O13 <sup>xi</sup>   | 0.95       | 1.90       | 2.828(4)   | 167          |
| O16—H16B…O8 <sup>ix</sup>    | 0.95       | 1.97       | 2.861(4)   | 155          |
| O17—H17A…O5 <sup>iv</sup>    | 0.95       | 2.09       | 2.826(7)   | 133          |
| O17—H17B…O19 <sup>xii</sup>  | 0.96       | 1.92       | 2.868(6)   | 168          |
| O18—H18A…O6 <sup>iv</sup>    | 0.97       | 1.73       | 2.686(4)   | 169          |
| O18—H18B…O8 <sup>v</sup>     | 0.96       | 1.69       | 2.634(4)   | 169          |
| O19—H19A…O17 <sup>viii</sup> | 0.96       | 2.32       | 2.868(6)   | 116          |
| O19—H19B…O4                  | 0.96       | 1.88       | 2.832(4)   | 172          |



Symmetry codes: (i)  $-x+1, y, -z+3/2$ ; (iii)  $x, -y+1, z-1/2$ ; (iv)  $x, -y+1, z+1/2$ ; (v)  $-x+1/2, y-1/2, -z+1/2$ ; (vi)  $-x, y, -z+1/2$ ; (vii)  $-x, -y+1, -z+1$ ; (viii)  $-x+1/2, -y+1/2, -z+3/2$ ; (ix)  $-x+1/2, -y+3/2, -z+1$ ; (x)  $-x+1, -y+1, -z+1$ ; (xi)  $x+1/2, -y+3/2, z+1/2$ ; (xii)  $x+1/2, y-1/2, z$ .

### Complex 3

| <i>Doner</i> —H... <i>Acceptor</i> | D—H  | H...A | D...A     | D—H...A |
|------------------------------------|------|-------|-----------|---------|
| O9—H9A...O2 <sup>iii</sup>         | 0.95 | 1.94  | 2.891 (5) | 171     |
| O9—H9B...O18 <sup>v</sup>          | 0.95 | 1.79  | 2.671 (5) | 151     |
| O10—H10A...O6 <sup>v</sup>         | 0.96 | 1.92  | 2.862 (5) | 168     |
| O10—H10B...O9                      | 0.96 | 1.92  | 2.876 (5) | 174     |
| O11—H11B...O19 <sup>vi</sup>       | 0.96 | 2.41  | 2.984 (4) | 118     |
| O11—H11A...O6 <sup>v</sup>         | 0.96 | 2.49  | 3.443 (6) | 170     |
| O12—H12A...O3 <sup>vii</sup>       | 0.96 | 1.76  | 2.703 (5) | 168     |
| O12—H12B...O7 <sup>i</sup>         | 0.96 | 1.93  | 2.855 (5) | 160     |
| O13—H13B...O1 <sup>viii</sup>      | 0.94 | 1.92  | 2.748 (5) | 145     |
| O13—H13A...O16                     | 0.94 | 2.17  | 2.813 (5) | 125     |
| O14—H14A...O18 <sup>j</sup>        | 0.96 | 1.81  | 2.759 (5) | 170     |
| O14—H14B...O1 <sup>ix</sup>        | 0.96 | 2.02  | 2.920 (5) | 155     |
| O15—H15B...O5 <sup>x</sup>         | 0.96 | 2.41  | 3.301 (5) | 155     |
| O15—H15A...O2 <sup>viii</sup>      | 0.96 | 1.84  | 2.764 (5) | 161     |
| O16—H16B...O8 <sup>i</sup>         | 0.94 | 2.22  | 2.892 (5) | 128     |
| O16—H16A...O7 <sup>i</sup>         | 0.94 | 2.57  | 3.291 (5) | 134     |
| O17—H17B...O19 <sup>xi</sup>       | 0.94 | 1.92  | 2.833 (8) | 162     |
| O17—H17A...O13 <sup>ii</sup>       | 0.95 | 2.18  | 2.766 (8) | 119     |
| O18—H18A...O8                      | 0.96 | 1.70  | 2.627 (5) | 162     |
| O18—H18B...O6 <sup>xii</sup>       | 0.96 | 1.74  | 2.695 (5) | 171     |
| O19—H19A...O4 <sup>i</sup>         | 0.96 | 1.97  | 2.880 (5) | 158     |
| O19—H19B...O4 <sup>xiii</sup>      | 0.96 | 1.96  | 2.880 (5) | 161     |

Symmetry codes: (i)  $-x+1, y, -z+1/2$ ; (ii)  $-x+1, -y+1, -z$ ; (iii)  $x, -y, z+1/2$ ; (v)  $-x+1/2, y-1/2, -z+1/2$ ; (vi)  $-x+1, -y, -z+1$ ; (vii)  $-x+1, -y, -z$ ; (viii)  $-x+1/2, -y+1/2, -z$ ; (ix)  $x+1/2, y+1/2, z$ ; (x)  $-x+1/2, y+1/2, -z+1/2$ ; (xi)  $-x+1, -y+1, -z+1$ ; (xii)  $-x+1/2, -y+1/2, -z+1$ ; (xiii)  $x, y, z+1$ .

### Complex 4

| <i>Doner</i> —H... <i>Acceptor</i> | D—H  | H...A | D...A     | D—H...A |
|------------------------------------|------|-------|-----------|---------|
| O9—H9A...O18 <sup>v</sup>          | 0.96 | 1.73  | 2.689 (4) | 173     |
| O9—H9B...O6 <sup>iii</sup>         | 0.96 | 1.98  | 2.907 (4) | 162     |
| O10—H10A...O9                      | 0.96 | 1.92  | 2.874 (4) | 171     |
| O10—H10B...O2 <sup>v</sup>         | 0.96 | 1.92  | 2.862 (4) | 166     |
| O11—H11A...O19                     | 0.96 | 2.42  | 2.971 (3) | 117     |
| O11—H11B...O4 <sup>iv</sup>        | 0.96 | 1.91  | 2.851 (4) | 166     |
| O12—H12A...O3 <sup>vi</sup>        | 0.96 | 1.94  | 2.861 (4) | 159     |
| O12—H12B...O7 <sup>vii</sup>       | 0.96 | 1.76  | 2.700 (4) | 165     |
| O13—H13A...O5 <sup>viii</sup>      | 0.95 | 2.15  | 2.758 (4) | 121     |
| O13—H13B...O16 <sup>ix</sup>       | 0.94 | 2.29  | 2.830 (4) | 115     |
| O14—H14A...O5 <sup>iii</sup>       | 0.96 | 2.00  | 2.920 (4) | 161     |
| O14—H14B...O18 <sup>x</sup>        | 0.96 | 1.82  | 2.755 (4) | 165     |
| O15—H15A...O6 <sup>iii</sup>       | 0.96 | 1.83  | 2.774 (4) | 165     |
| O15—H15B...O1                      | 0.96 | 2.44  | 3.294 (4) | 148     |
| O16—H16B...O4 <sup>xi</sup>        | 0.95 | 2.16  | 2.885 (4) | 132     |
| O17—H17A...O1 <sup>ii</sup>        | 0.96 | 1.88  | 2.840 (7) | 174     |
| O17—H17B...O19 <sup>xii</sup>      | 0.96 | 1.91  | 2.849 (7) | 167     |
| O18—H18A...O4                      | 0.96 | 1.70  | 2.640 (4) | 167     |
| O18—H18B...O2 <sup>x</sup>         | 0.96 | 1.75  | 2.702 (4) | 171     |
| O19—H19B...O12                     | 0.96 | 2.57  | 3.491 (6) | 161     |

Symmetry codes: (ii)  $-x+1, y, -z+3/2$ ; (iii)  $x, -y+1, z-1/2$ ; (iv)  $x, -y+1, z+1/2$ ; (v)  $-x+1/2, y-1/2, -z+1/2$ ,

---

$-z+3/2$ ; (vi)  $-x, y, -z+3/2$ ; (vii)  $-x, -y+1, -z+2$ ; (viii)  $-x+1/2, -y+3/2, -z+2$ ; (ix)  $-x+1/2, y+1/2, -z+3/2$ ; (x)  $-x+1/2, -y+3/2, -z+1$ ; (xi)  $x+1/2, y-1/2, z$ ; (xii)  $x+1/2, y+1/2, z$ .

---
